# Supplementary material for: Ultra-fast capture of U(vi) from aqueous solutions by chitosan-based foam with macropores
Source: Royal Society of Chemistry journal article supplement (doi:10.1039/d5ra04402b), 2026-04-02
Supplement: d5ra04402b2.pdf [file d5ra04402b2.pdf]

## Supplementary Information for Ultra-fast capture of U(VI) from aqueous solution by chitosan-based foam with macropores

Lirong Yang<sup>a</sup>, Tingdong Zhou<sup>b</sup>, Yuqian Jiang<sup>a</sup>, Huizhou Chen<sup>a</sup>, Wenjing Yang<sup>a</sup>, Haoyu Huang<sup>a</sup>, Jianguo Gao<sup>c</sup>,

Deming Huang<sup>d\*</sup>, Jie Tang<sup>a\*</sup>

<sup>a</sup> School of Chemistry and Chemical Engineering, Mianyang Teachers' College, Mianyang 621000, PR China

<sup>b</sup> Key Laboratory of materials and surface technology (Ministry of Education), School of Materials Science and Engineering, Xihua University, Chengdu, 610039, PR China

<sup>c</sup> School of Foreign Languages, Mianyang Teachers' College, Mianyang 621000, PR China

<sup>d</sup> School of mechanical and electrical, Mianyang Teachers' College, Mianyang 621000, PR China

### SI.1 The molecular ratio of CS-Glns

Table S1 The molecular ratio of CS-Glns

### SI.2 Structural and morphological characterization

Fig. S1 The potential reaction mechanism of CS-Gln

### SI.3 Kinetics studies

Fig. S2 Line plots of (a) pseudo-first-order kinetics models

### SI.4 Adsorption isotherms

Table S2 The parameters fitted by Langmuir models

### SI.5 Characterization and mechanism of UO<sub>2</sub><sup>2+</sup> adsorption

Fig.S3 SEM of CS-Gln2 before (a) and after (b) adsorption uranium

Table S3 Binding energy of U4f, C1s, O1s, N 1s before and after U(VI) uptake

### SI.1 The molecular ratio of CS-Glns

Table S1 The molecular ratio of CS-Glns

| Sample   | CS       |                                  | Gln      |                                  |
|----------|----------|----------------------------------|----------|----------------------------------|
|          | weight/g | molality/mol<br>Kg <sup>-1</sup> | weight/g | molality/mol<br>Kg <sup>-1</sup> |
| CS-Gln-1 |          |                                  | 0.75     | 0.00513                          |
| CS-Gln-2 | 0.5      | 0.003                            | 0.5      | 0.003                            |
| CS-Gln-3 |          |                                  | 0.25     | 0.0017                           |

\* Corresponding authors.

E-mail addresses: deming\_huang03@163.com (Deming Huang), tyy0816@163.com (J. Tang).

## SI.2 Structural and morphological characterization

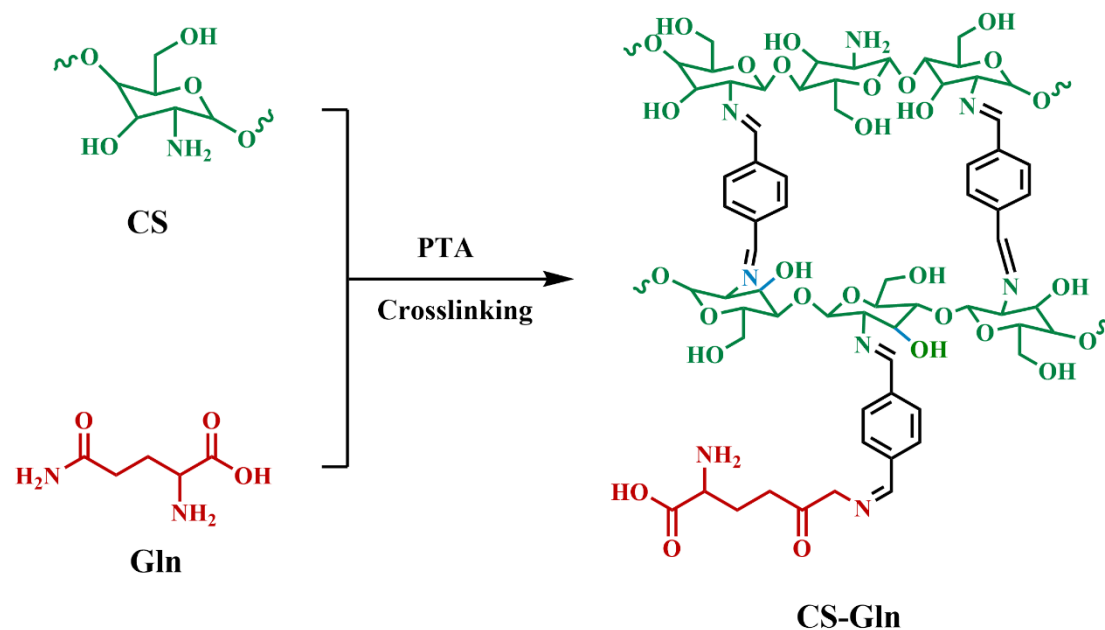

Fig. S1 The potential reaction mechanism of CS-Gln

## SI.3 Kinetics studies

The experimental data were fitted by Pseudo-first-order kinetic model (Equ.S1), Pseudo-second-order kinetic model (Equ.S2). The models equations were as follows:

$$\ln(q_e - q_t) = \ln q_e - k_1 t \quad (\text{S1})$$

$$\frac{t}{q_t} = \frac{1}{K_2 q_e^2} + \frac{t}{q_e} \quad (\text{S2})$$

Herein,  $q_e$  (mg/g) and  $q_t$  (mg/g) are the adsorption capacities of metal ions at equilibrium and time  $t$  (min), respectively;  $t$  is the time of adsorption;  $k_1$  ( $\text{min}^{-1}$ ) and  $k_2$  ( $\text{g mg}^{-1}\text{min}^{-1}$ ) are the adsorption rate constants of pseudo-first-order kinetic, and pseudo-second-order kinetic model, respectively.

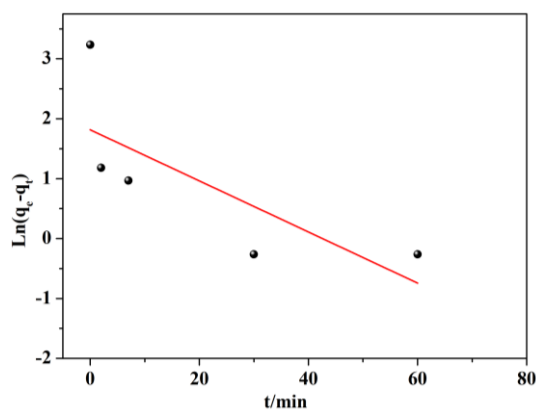

Fig. S2 Line plots of pseudo-first-order models

### SI.4 Adsorption isotherms

The Freundlich (Equ.S3), Langmuir (Equ.S4) and Sips (Equ.S5) isothermal adsorption models are used to fit experimental data. The three isothermal model can be expressed as follows:

$$q_e = K_F C_e^{1/n_f} \quad (S3)$$

$$q_e = \frac{q_m K_L C_e}{1 + K_L C_e} \quad (S4)$$

$$q_e = \frac{q_m (K_S C_e)^{1/n_s}}{1 + (K_S C_e)^{1/n_s}} \quad (S5)$$

$q_e$  and  $q_m$  are the equilibrium adsorption capacity and maximum theoretical adsorption capacity (mg/g), respectively;  $C_e$  is the concentration of uranium in solution (mg/L) during adsorption equilibrium;  $K_F$  (mg/g)/(L/mg)<sup>n</sup> is Freundlich constant, relating to adsorption capacity;  $n_f$  is another characteristic constant of Freundlich, relating to adsorption strength;  $K_L$  (L/mg) is the Langmuir constant, which indicates the affinity between the adsorbate and the adsorbent;  $K_s$  (L/mg) is the Langmuir association constant,  $n_s$  refers to Freundlich heterogeneous constant, When it is close to 1.0, the adsorbent surface is more homogeneous. The larger  $n_s$  value is, the more heterogeneous the adsorption is.

Table S2 The parameters fitted by Langmuir models

| T (K)   | Langmuir |         | R <sup>2</sup> |
|---------|----------|---------|----------------|
|         | $q_m$    | $K_L$   |                |
|         | (mg/g)   | (L/mg)  |                |
| CS-Gln2 | 558      | 0.00266 | 0.976          |

### SI.5 Characterization and mechanism of UO<sub>2</sub><sup>2+</sup> adsorption

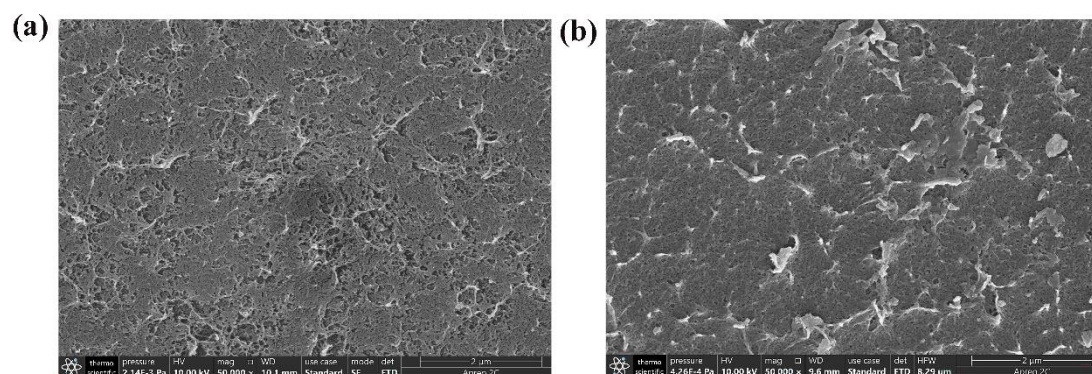

Fig. S3 SEM of CS-Gln2 before (a) and after (b) adsorption uranium

Table S3 Binding energy of U4f, C1s, O1s, N 1s before and after U(VI) uptake

| Valence states |                    | Functional group  | Before U(VI)<br>adsorption | After U(VI)<br>adsorption |
|----------------|--------------------|-------------------|----------------------------|---------------------------|
| U4f            | U4f <sub>7/2</sub> | --                | --                         | 390.02                    |
|                | U4f <sub>5/2</sub> | --                | --                         | 379.12                    |
| C1s            |                    | C-N               | 284.67                     | 284.87                    |
|                |                    | C=N               | 286.51                     | 286.06                    |
|                |                    | C=C               | 282.63                     | 282.57                    |
|                |                    | C=O               | 283.73                     | 284.09                    |
|                |                    | C-C               | 283.19                     | 283.22                    |
|                |                    | C=N               | 399.47                     | 400.26                    |
| N1s            |                    | C-N               | 398.02                     | 397.93                    |
|                |                    | C-NH <sub>2</sub> | 397.15                     | 397.21                    |
|                |                    | C-O               | 531.99                     | 531.54                    |
| O1s            |                    | C=O               | 531.13                     | 531.23                    |
|                |                    | O-H               | 530.87                     | 530.07                    |
